# Supplementary material for: Precise preparation of highly monodisperse ZrO2@SiO2 core–shell nanoparticles with adjustable refractive indices
Source: Royal Society of Chemistry journal article supplement (doi:10.1039/c3tc30324a), 2013-01-01
Supplement: c3tc30324a.pdf [file c3tc30324a.pdf]

## Supporting Information

### Precise preparation of highly monodisperse $\text{ZrO}_2@\text{SiO}_2$ core-shell nanoparticles with adjustable refractive index

Xiaoli Yang,<sup>a,b</sup> Ning Zhao,<sup>a,\*</sup> Qingzhu Zhou,<sup>a</sup> Chao Cai,<sup>a,b</sup> Xiaoli Zhang,<sup>a</sup> and Jian Xu<sup>a,\*</sup>

<sup>a</sup>Beijing National Laboratory for Molecular Sciences, Laboratory of Polymer Physics and Chemistry, Institute of Chemistry, Chinese Academy of Sciences, Beijing, 100190, P. R. China.

<sup>b</sup>University of Chinese Academy of Sciences, Beijing, 100049, P. R. China.

\*Corresponding author. E-mail address: [jxu@iccas.ac.cn](mailto:jxu@iccas.ac.cn), [zhaoning@iccas.ac.cn](mailto:zhaoning@iccas.ac.cn); Tel.: +86 10 62657919; Fax: +86 10 62657919.

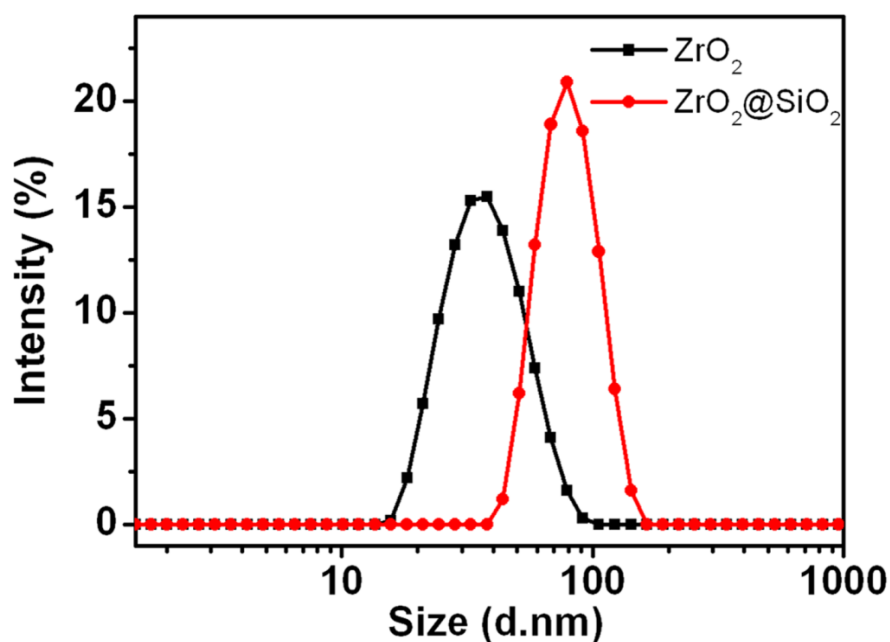

Fig.S1 Size distribution of  $\text{ZrO}_2$  nanoparticles and resulted  $\text{ZrO}_2@\text{SiO}_2$  CSNs.

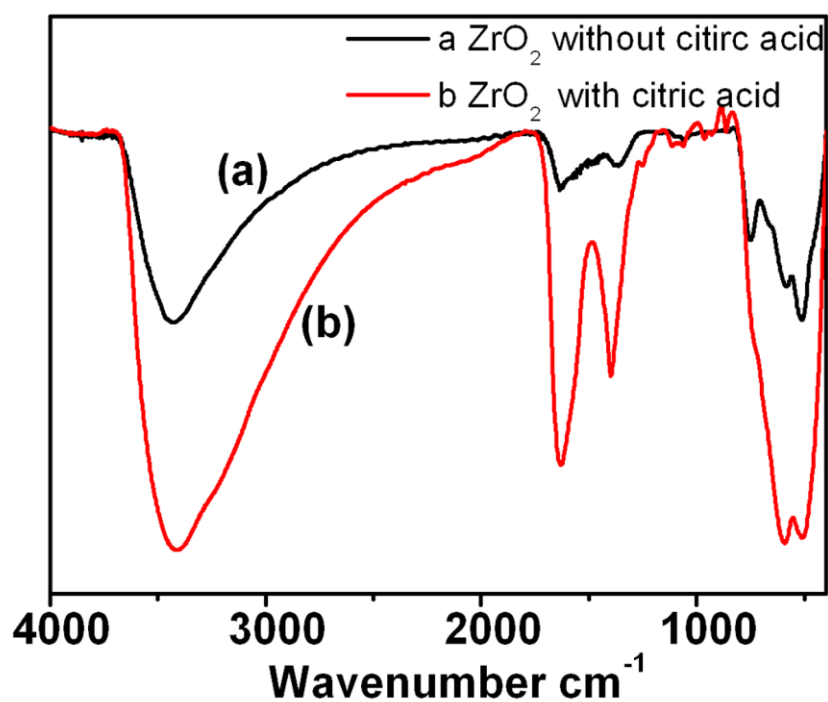

Fig.S2 FT-IR spectra of  $\text{ZrO}_2$  prepared without (a) and with (b) citric acid.

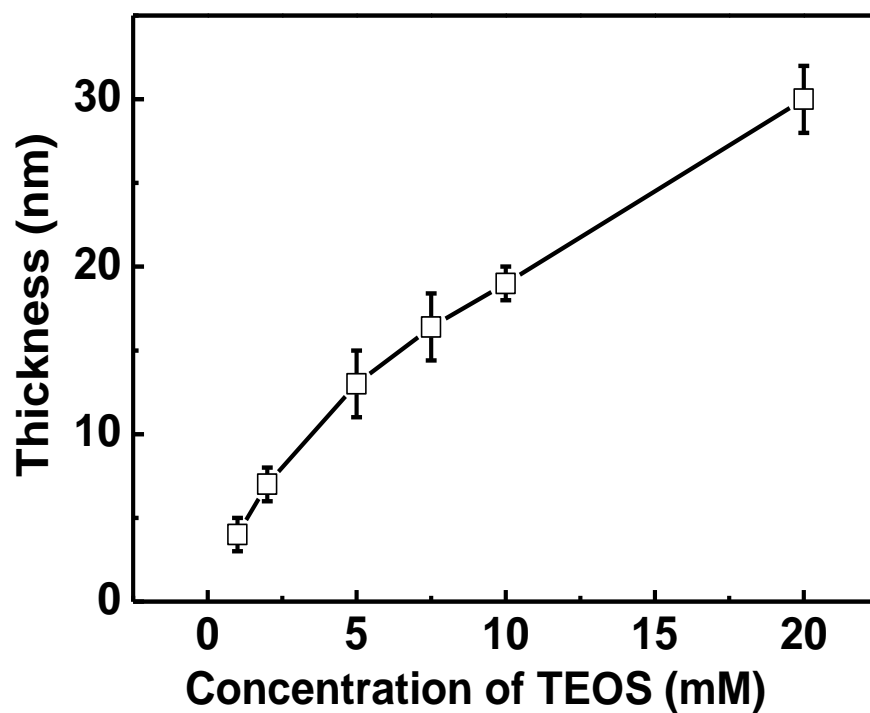

Fig. S3 The change of silica shell thickness prepared by different concentrations of TEOS.

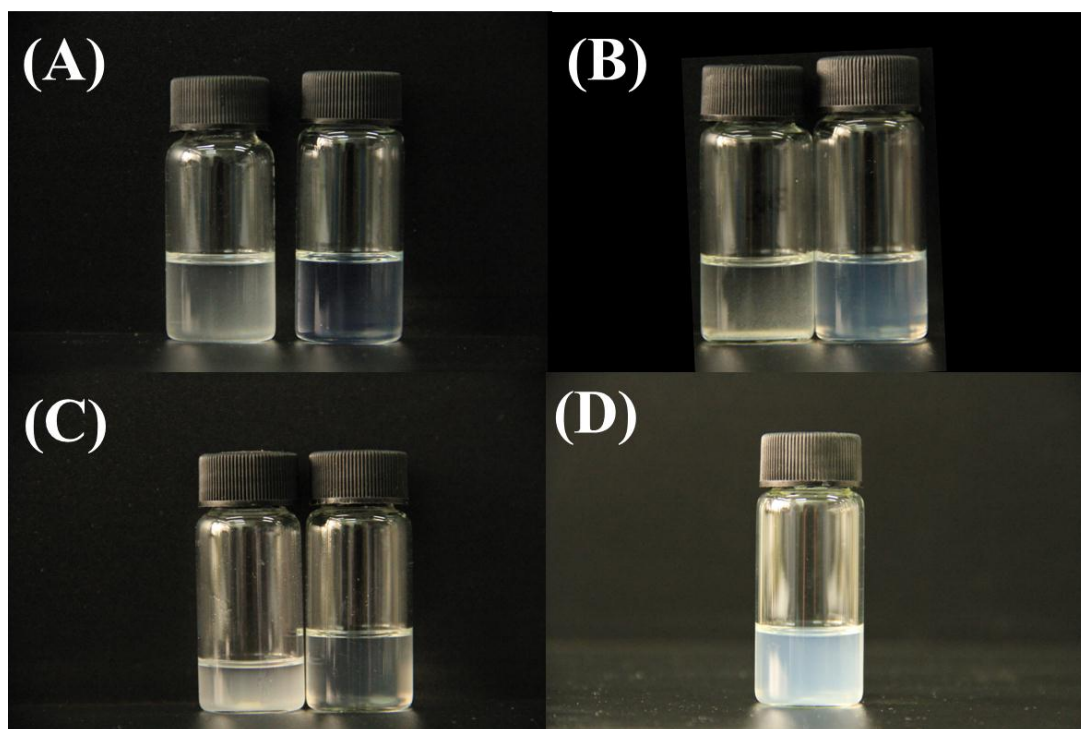

**Fig.S4** Comparison photos of  $\text{ZrO}_2$  nanoparticles (left) and methyl modified  $\text{ZrO}_2@\text{SiO}_2$  nanoparticles (right) dispersed in (A) dimethyl benzene, (B) isoamyl alcohol and (C) chloroform. (D) is the dispersion of modified  $\text{ZrO}_2@\text{SiO}_2$  in ethanol.

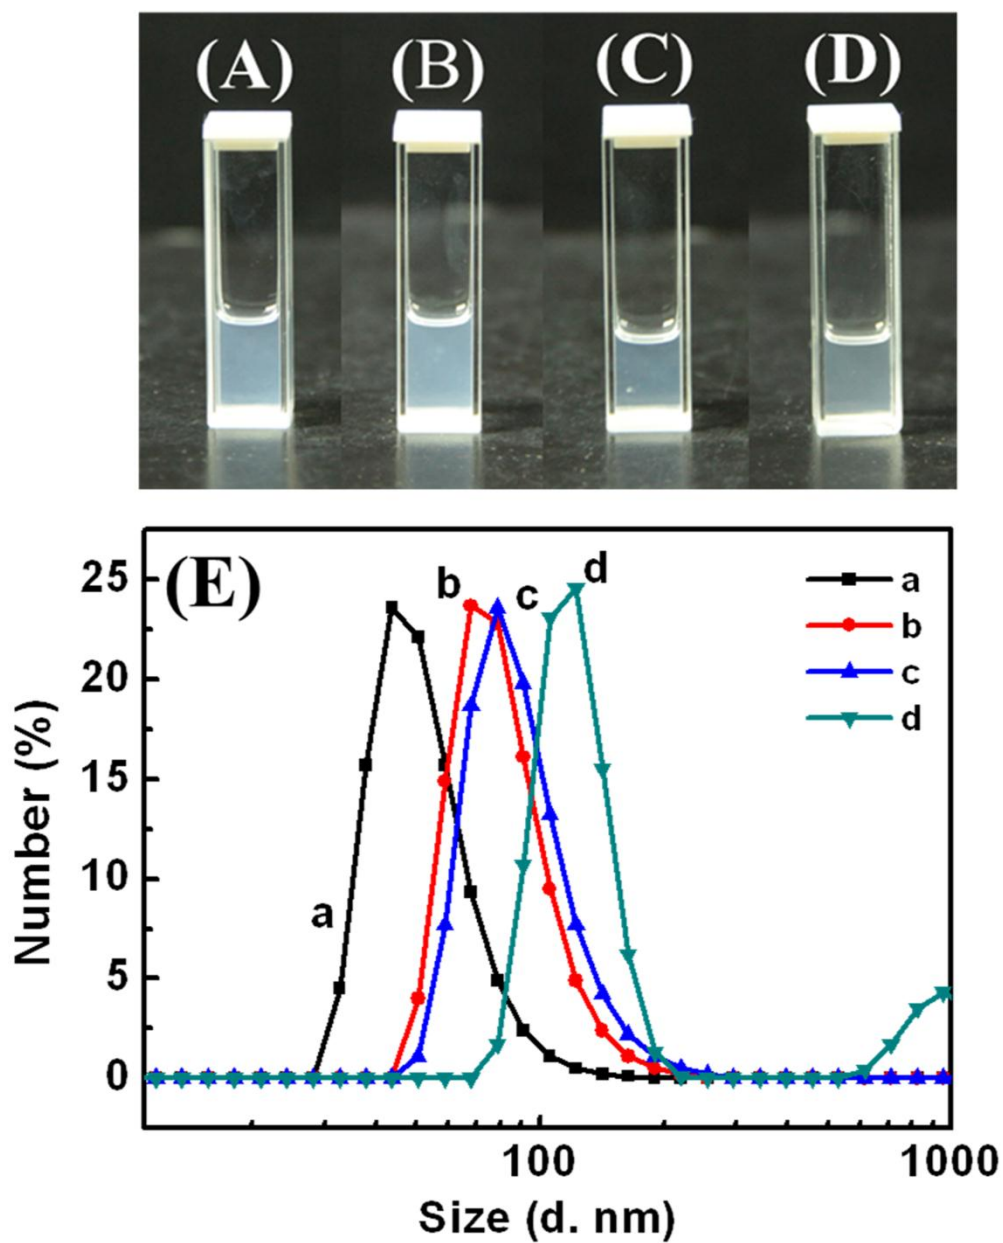

**Fig.S5** Photographs of CSNs dispersed in different conditions after storage for more than 2 months: (A)  $\text{ZrO}_2@\text{SiO}_2$  CSNs in ethanol; (B) to (D) are the photos of MTES modified  $\text{ZrO}_2@\text{SiO}_2$  CSNs dispersed in ethanol, isoamyl alcohol and chloroform, respectively. (E) is the corresponding DLS curves of (A) to (D).
